# Supplementary material for: A facile approach to enhancing activity of Ni2P/SiO2catalyst for hydrodechlorination of chlorobenzene: promoting effect of water and oxygen
Source: Royal Society of Chemistry journal article supplement (doi:10.1039/c5cy00044k), 2015-01-01
Supplement: c5cy00044k1.pdf [file c5cy00044k1.pdf]

Supplementary Information for

**A facile approach to enhancing activity of Ni<sub>2</sub>P/SiO<sub>2</sub> catalyst for hydrodechlorination of chlorobenzene: promoting effect of water or oxygen**

Jixiang Chen\*, Ti Guo, Kelun Li, Lingmin Sun

**Table 1S** Properties of Ni<sub>2</sub>P/SiO<sub>2</sub> before and after pretreatment

| Catalyst                                | S <sub>BET</sub> (m <sup>2</sup> /g) | Pore volume (cm <sup>3</sup> /g) | Mean pore diameter(nm) | Ni content (wt.%) | Ni/P molar ratio | Ni <sub>2</sub> P particle size(nm) <sup>a</sup> |
|-----------------------------------------|--------------------------------------|----------------------------------|------------------------|-------------------|------------------|--------------------------------------------------|
| Ni <sub>2</sub> P/SiO <sub>2</sub>      | 294                                  | 0.43                             | 5.9                    | 12.7              | 1.5              | 12.6                                             |
| Ni <sub>2</sub> P/SiO <sub>2</sub> -513 | 292                                  | 0.42                             | 5.7                    | 13.7              | 1.6              | 13.5                                             |
| Ni <sub>2</sub> P/SiO <sub>2</sub> -543 | 297                                  | 0.43                             | 5.8                    | 13.7              | 1.6              | 13.8                                             |
| Ni <sub>2</sub> P/SiO <sub>2</sub> -573 | 288                                  | 0.41                             | 5.7                    | 13.7              | 1.5              | 14.0                                             |
| Ni <sub>2</sub> P/SiO <sub>2</sub> -673 | 290                                  | 0.42                             | 5.7                    | 13.7              | 1.5              | 15.5                                             |

<sup>a</sup> Calculated by Scherrer equation on the base of Ni<sub>2</sub>P(111) reflection ( $2\theta=40.8^\circ$ ).

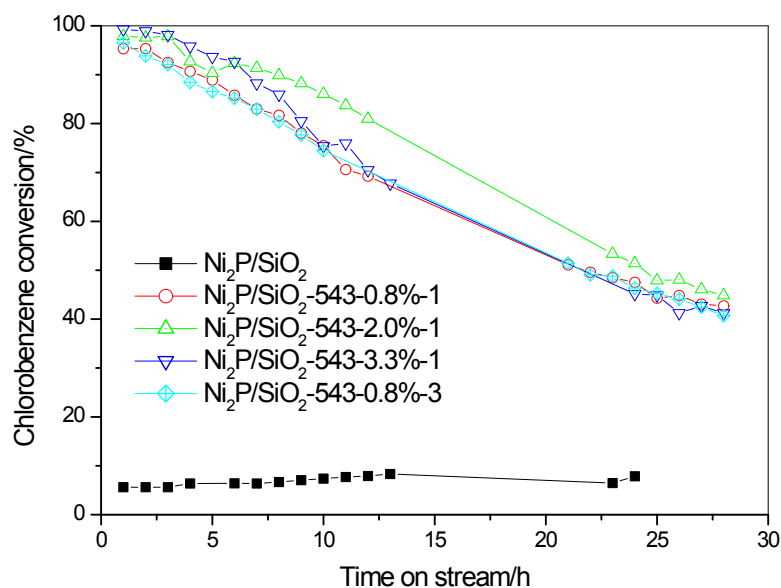

**Fig. 1S** Activity of Ni<sub>2</sub>P/SiO<sub>2</sub> treated with a H<sub>2</sub>O/H<sub>2</sub> flow.

The treated catalysts are denoted as Ni<sub>2</sub>P/SiO<sub>2</sub>-T-c%-t, where T, c% and t represent treatment temperature (K), water concentration in H<sub>2</sub> and treatment time (h).

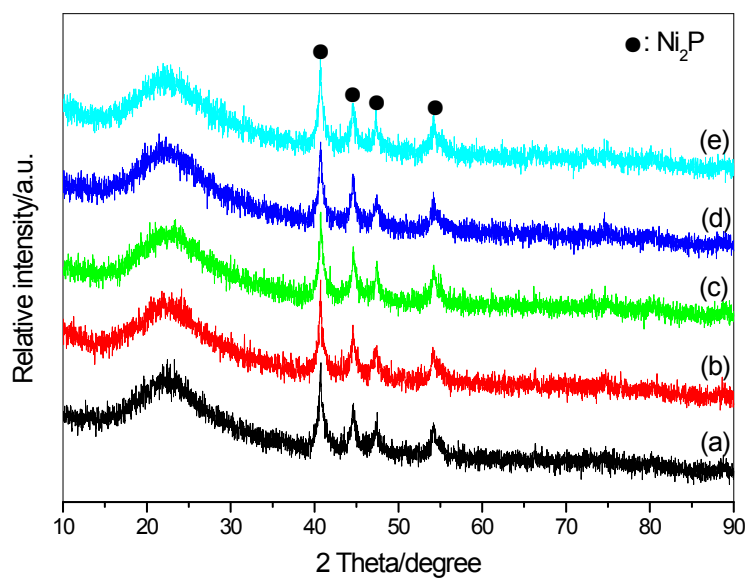

Fig. 2S XRD patterns of (a)  $\text{Ni}_2\text{P}/\text{SiO}_2$ ; (b)  $\text{Ni}_2\text{P}/\text{SiO}_2$ -513; (c)  $\text{Ni}_2\text{P}/\text{SiO}_2$ -543; (d)  $\text{Ni}_2\text{P}/\text{SiO}_2$ -573; (e)  $\text{Ni}_2\text{P}/\text{SiO}_2$ -673

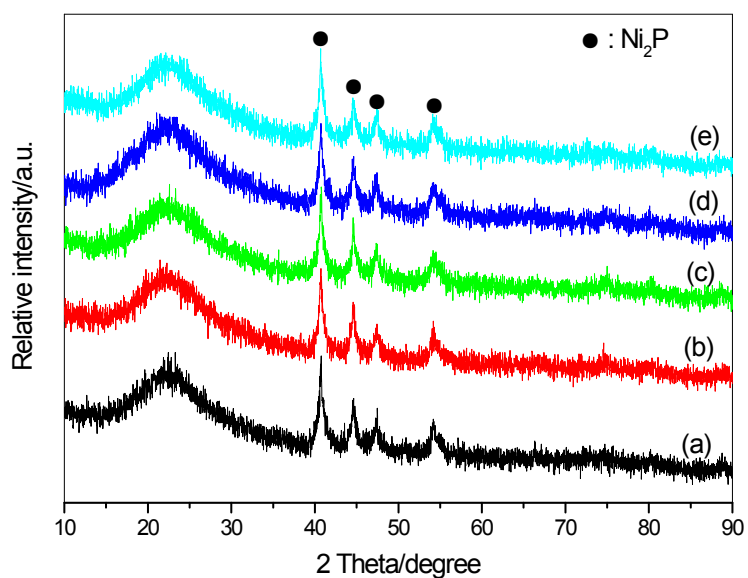

Fig. 3S XRD patterns of (a)  $\text{Ni}_2\text{P}/\text{SiO}_2$ ; (b)  $\text{Ni}_2\text{P}/\text{SiO}_2$ -270-0.8%-1; (c)  $\text{Ni}_2\text{P}/\text{SiO}_2$ -270-2.0%-1; (d)  $\text{Ni}_2\text{P}/\text{SiO}_2$ -270-3.3%-1; (e)  $\text{Ni}_2\text{P}/\text{SiO}_2$ -270-0.8%-3

The treated catalysts are denoted as  $\text{Ni}_2\text{P}/\text{SiO}_2$ -T-c%-t, where T, c% and t represent treatment temperature (K), water concentration in  $\text{H}_2$  and treatment time (h).

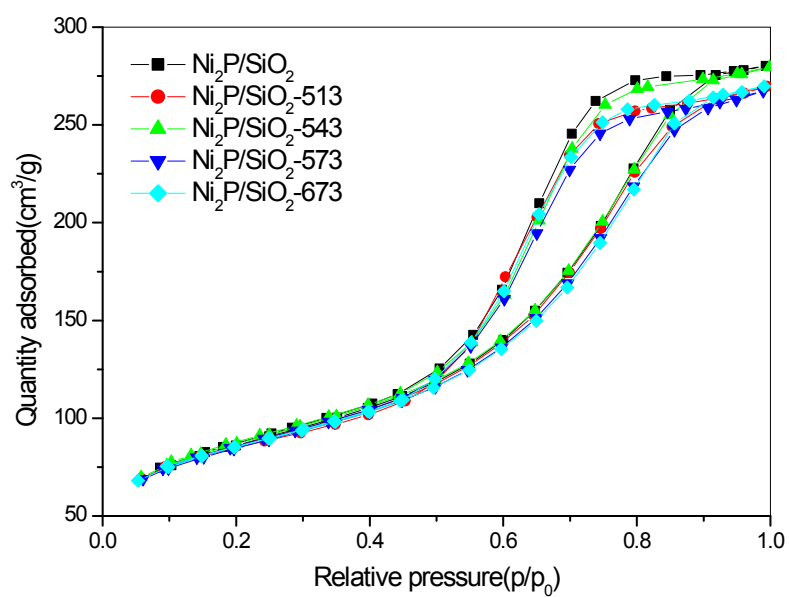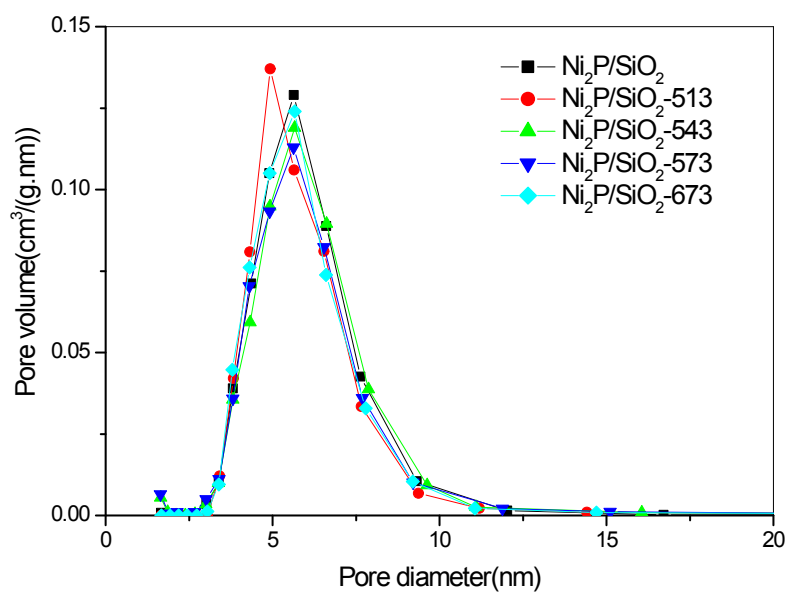

Fig. 4S Adsorption-desorption isotherms (A) and pore diameter distributions (B) of  $\text{Ni}_2\text{P}/\text{SiO}_2$  and  $\text{Ni}_2\text{P}/\text{SiO}_2\text{-T}$ .

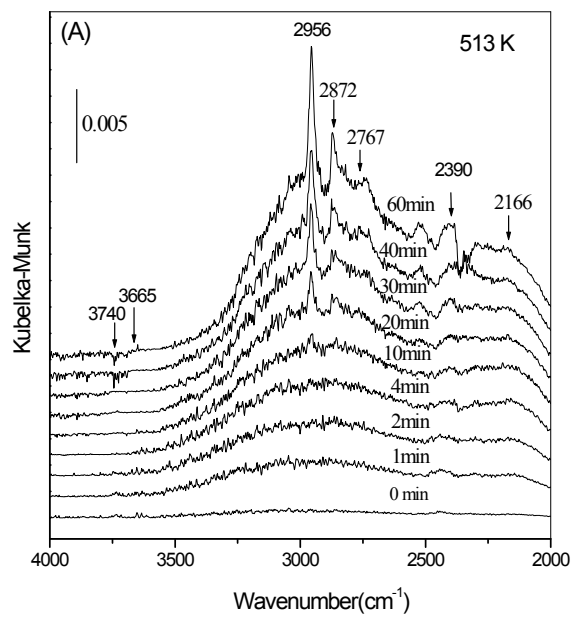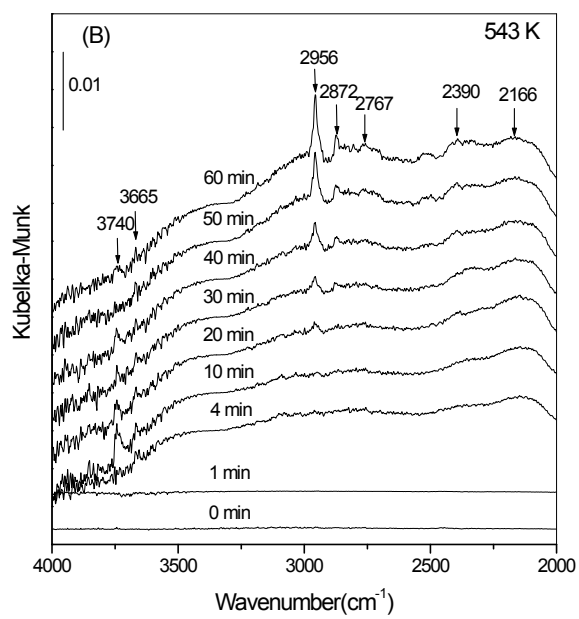

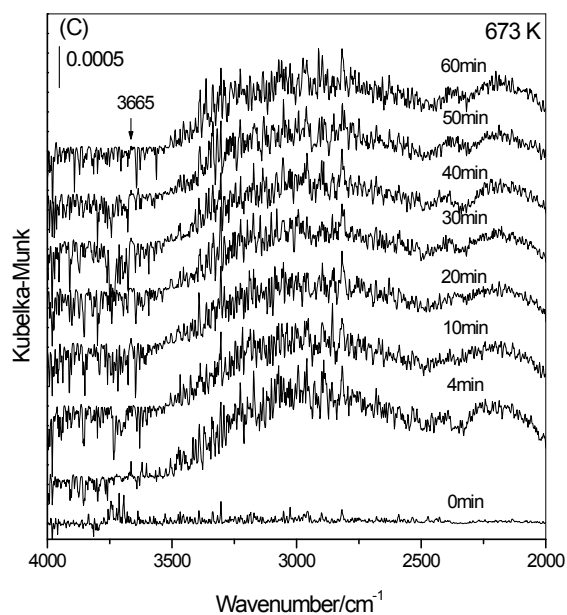

Fig. 5S In situ DRIFTS spectra of re-reduced Ni<sub>2</sub>P/SiO<sub>2</sub>(O<sub>2</sub>) treated with 0.8% H<sub>2</sub>O/H<sub>2</sub> at (A) 513 K; (B) 543 K and (C) 673 K

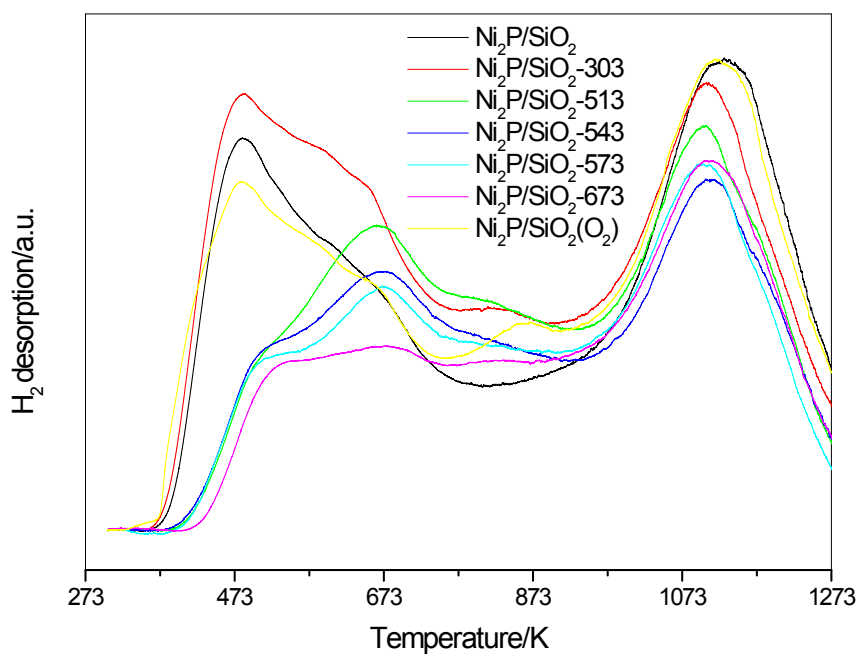

Fig. 6S H<sub>2</sub>-TPD profiles of Ni<sub>2</sub>P/SiO<sub>2</sub>, Ni<sub>2</sub>P/SiO<sub>2</sub>-T and re-reduced Ni<sub>2</sub>P/SiO<sub>2</sub>(O<sub>2</sub>)

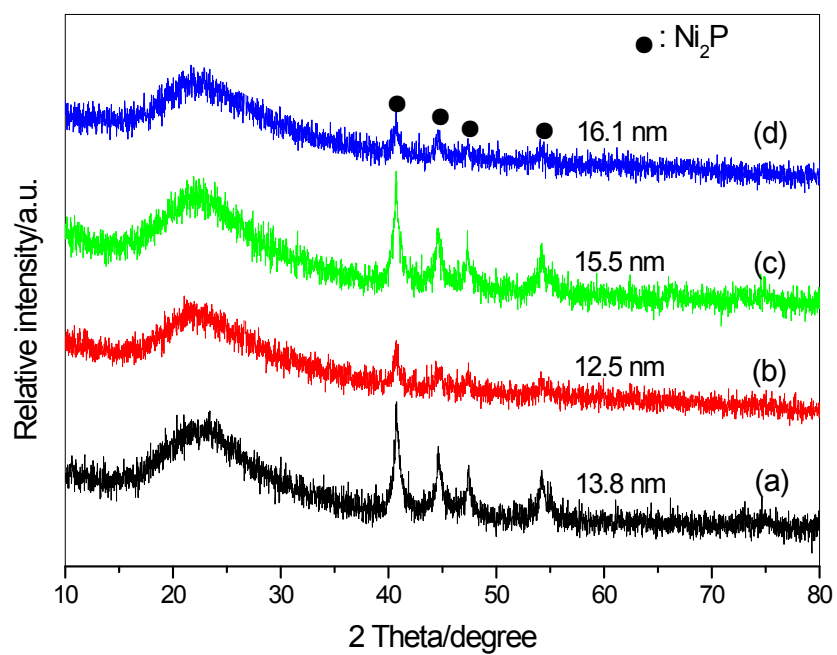

Fig. 7S XRD patterns of (a) Ni<sub>2</sub>P/SiO<sub>2</sub>; (b) used Ni<sub>2</sub>P/SiO<sub>2</sub>-543; (c) Ni<sub>2</sub>P/SiO<sub>2</sub>-673 and (d) used Ni<sub>2</sub>P/SiO<sub>2</sub>-673

Note: the figure on each pattern is the Ni<sub>2</sub>P crystallite size calculated by Scherrer equation on the base of Ni<sub>2</sub>P(111) reflection ( $2\theta=40.8^\circ$ ).
